# Supplementary material
Source: PubMed Central journal article supplement (PMC4420754)

A

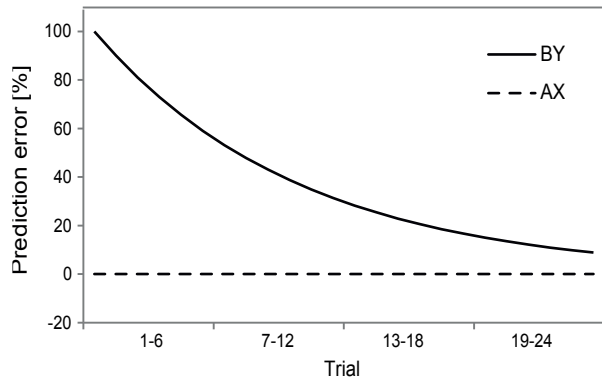

Figure S1

Supplement: supp_nsu130_Figure_S1_Seid-Fatemi.pdf [file supp_nsu130_Figure_S1_Seid-Fatemi.pdf]

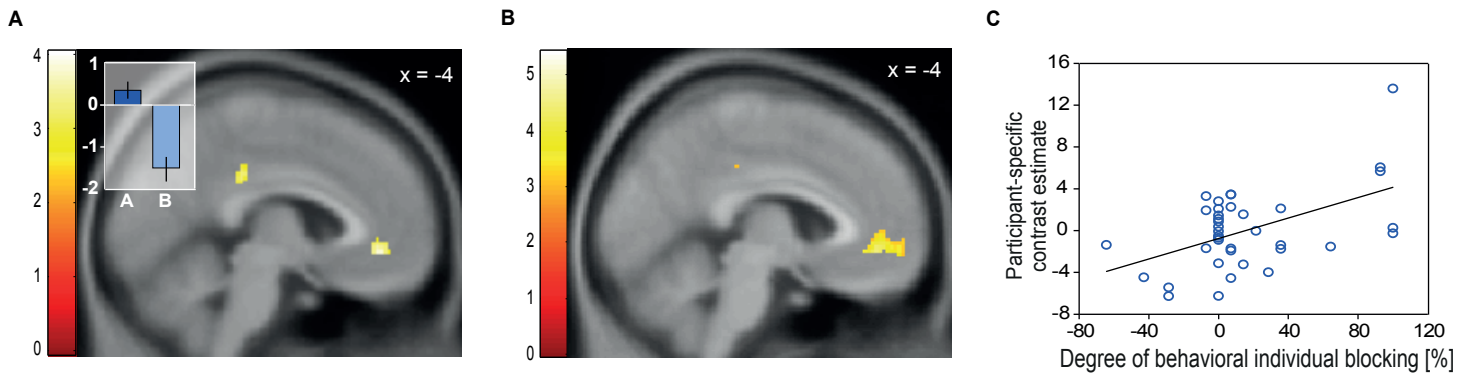

Figure S2

Supplement: supp_nsu130_Figure_S2_Seid-Fatemi.pdf [file supp_nsu130_Figure_S2_Seid-Fatemi.pdf]
